# Supplementary material
Source: PubMed Central journal article supplement (PMC9510408)
Supplement: archdischild-2021-323616supp001.pdf [file archdischild-2021-323616supp001.pdf]

| 2018         |     |     |     | 2019 |     |     |     |             |     |     |     | 2020              |     |     |     |     |     |     |     |     |     |     |     |      |     |     |     |
|--------------|-----|-----|-----|------|-----|-----|-----|-------------|-----|-----|-----|-------------------|-----|-----|-----|-----|-----|-----|-----|-----|-----|-----|-----|------|-----|-----|-----|
| Sept         | Oct | Nov | Dec | Jan  | Feb | Mar | Apr | May         | Jun | Jul | Aug | Sept              | Oct | Nov | Dec | Jan | Feb | Mar | Apr | May | Jun | Jul | Aug | Sept | Oct | Nov | Dec |
| CSC services |     |     |     |      |     |     |     | SEN support |     |     |     | Hospital contacts |     |     |     |     |     |     |     |     |     |     |     |      |     |     |     |
| Exposure     |     |     |     |      |     |     |     |             |     |     |     | Outcomes          |     |     |     |     |     |     |     |     |     |     |     |      |     |     |     |

**Supplementary Figure 1** Measuring vulnerability (exposure) and hospital contacts (outcomes) for secondary school pupils in years 7 to 11 in 2019/20. SEN = special educational needs; CSC = children's social care. Green shading indicates the 2019/20 academic year. Red line indicates the beginning of the pandemic (23 March 2020). At the time of analysis, the ECHILD Database included data about SEN support up to 31 March 2020 and about CSC services up to 31 March 2019. This means we could identify children who had social care services before the pandemic, but we were not able to identify which children had social care services at the time the pandemic began.

**Supplementary Table 1** Prevalence of planned hospital care in 2018 among pupils in school years 7 to 11, by type of statutory support or service.

| <b>Outpatient attendances</b> | <b>Number of pupils in years 7 to 11 (N)</b> | <b>Number receiving planned hospital care (n)</b> | <b>% receiving planned hospital care (n/N)</b> |
|-------------------------------|----------------------------------------------|---------------------------------------------------|------------------------------------------------|
| No support/services           | 2,286,790                                    | 516,102                                           | 22.6%                                          |
| Any support/services          | 588,549                                      | 205,114                                           | <b>34.9%</b>                                   |
| • SEN only                    | 396,765                                      | 140,418                                           | <b>35.4%</b>                                   |
| • CSC only                    | 109,915                                      | 27,887                                            | <b>25.4%</b>                                   |
| • Both SEN and CSC            | 81,869                                       | 36,809                                            | <b>45.0%</b>                                   |
| <b>Planned admissions</b>     |                                              |                                                   |                                                |
| No support/services           | 2,286,790                                    | 59,458                                            | 2.6%                                           |
| Any support/services          | 588,549                                      | 27,139                                            | <b>4.6%</b>                                    |
| • SEN only                    | 396,765                                      | 17,915                                            | <b>4.5%</b>                                    |
| • CSC only                    | 109,915                                      | 3,227                                             | <b>2.9%</b>                                    |
| • Both SEN and CSC            | 81,869                                       | 5,997                                             | <b>7.3%</b>                                    |

SEN = special educational needs support; CSC = children's social care services. Bold indicates a statistically significant difference from "No support/services" reference group at  $p < 0.05$ . 2018 was the most recent full calendar year for which information related both SEN support and CSC services was available at the time of analysis.

**Supplementary Table 2** Type of scheduled outpatient appointments among pupils in school years 7 to 11 from 23 March to 31 December 2020, by type of statutory support or service.

|                      | Total (N) | In-person |              | Tele/virtual |              |
|----------------------|-----------|-----------|--------------|--------------|--------------|
|                      |           | n         | %            | n            | %            |
| No support/services  | 1,287,546 | 990,357   | 76.9%        | 297,189      | 23.1%        |
| Any support/services | 729,854   | 540,287   | <b>74.0%</b> | 189,567      | <b>26.0%</b> |
| • SEN only           | 502,107   | 371,082   | <b>73.9%</b> | 131,025      | <b>26.1%</b> |
| • CSC only           | 71,865    | 54,890    | <b>76.4%</b> | 16,975       | <b>23.6%</b> |
| • Both SEN and CSC   | 155,882   | 114,315   | <b>73.3%</b> | 41,567       | <b>26.7%</b> |

SEN = special educational needs support; CSC = children's social care services. Bold indicates a statistically significant difference from the "No support/services" reference group at  $p < 0.05$ .

**Supplementary Table 3** Attendance of scheduled outpatient appointments among pupils in school years 7 to 11 from 23 March to 31 December 2020, by type of statutory support or service and type of appointment.

|                      | All       |           |              | In-person |           |              | Tele/virtual |           |              |
|----------------------|-----------|-----------|--------------|-----------|-----------|--------------|--------------|-----------|--------------|
|                      | Attended  | Scheduled | % attended   | Attended  | Scheduled | % attended   | Attended     | Scheduled | % attended   |
| No support/services  | 1,135,391 | 1,287,546 | 88.2%        | 858,259   | 990,357   | 86.7%        | 277,132      | 297,189   | 93.3%        |
| Any support/services | 636,498   | 729,854   | <b>87.2%</b> | 459,700   | 540,287   | <b>85.1%</b> | 176,798      | 189,567   | 93.3%        |
| • SEN only           | 440,910   | 502,107   | <b>87.8%</b> | 318,326   | 371,082   | <b>85.8%</b> | 122,584      | 131,025   | <b>93.6%</b> |
| • CSC only           | 60,457    | 71,865    | <b>84.1%</b> | 45,023    | 54,890    | <b>82.0%</b> | 15,434       | 16,975    | <b>90.9%</b> |
| • Both SEN and CSC   | 135,131   | 155,882   | <b>86.7%</b> | 96,351    | 114,315   | <b>84.3%</b> | 38,780       | 41,567    | 93.3%        |

SEN = special educational needs support; CSC = children's social care services. Bold indicates a statistically significant difference from the "No support/services" reference group at  $p < 0.05$ .
